# Supplementary material
Source: publisher site journal article supplement (https://www.spandidos-publications.com/3677/downloadSupplementary)
Supplement: Supplementary file 1 [file downloadSupplementary]

## Sheet: Foglio1
Table SII. Enriched Gene Ontology terms in the Biological Process category of genes targeted by tomentosin in RPMI-8226 cell line.
Biological Process	Size	NES	FDR q-value	Number of DEGs	Upregulated genes	Downregulated genes
RESPONSE TO TOPOLOGICALLY INCORRECT PROTEIN	73	2.42102	0	15	ATF4, BAG3, DDIT3, DNAJA1, DNAJB1, DNAJB2, DNAJB9, HSPA1A, HSPA1B, HSPA4L, HSPA8, HSPB1, HSPH1, SERPINH1	CCND1
PROTEIN FOLDING	74	2.22832	0	12	BAG3, DFFA, DNAJA1, DNAJB1, DNAJB2, HSPA1A, HSPA1B, HSPA4L, HSPA8, HSPB1, HSPH1, PPID	N/A
POSITIVE REGULATION OF PRI MIRNA TRANSCRIPTION BY RNA POLYMERASE II	20	-2.37842	0	3	N/A	PDGFB, SMAD3, TERT
CHAPERONE MEDIATED PROTEIN FOLDING	30	2.16363	0.000509176	9	DFFA, DNAJB1, DNAJB2, HSPA1A, HSPA1B, HSPA8, HSPB1, HSPH1, PPID	N/A
REGULATION OF CELLULAR RESPONSE TO HEAT	32	2.09607	0.00181182	7	AKT1S1, BAG3, DNAJB1, HSPA1A, HSPA1B, HSPA8, HSPH1	N/A
CELLULAR RESPONSE TO TOPOLOGICALLY INCORRECT PROTEIN	56	2.1156	0.00188567	8	ATF4, BAG3, DDIT3, DNAJB9, HSPA1A, HSPA1B, HSPA8	CCND1
CHAPERONE COFACTOR DEPENDENT PROTEIN REFOLDING	18	2.01586	0.0101677	5	DNAJB1, HSPA1A, HSPA1B, HSPA8, HSPH1	N/A
DE NOVO PROTEIN FOLDING	21	2.00155	0.0103389	5	DNAJB1, HSPA1A, HSPA1B, HSPA8, HSPH1	N/A
RESPONSE TO HEAT	72	1.98942	0.0112088	11	AKT1S1, BAG3, DNAJA1, DNAJB1, HMOX1, HSPA1A, HSPA1B, HSPA8, HSPH1	CXCL10, CXCL12
PRI MIRNA TRANSCRIPTION BY RNA POLYMERASE II	32	-2.13292	0.0173612	4	FOSL1	PDGFB, SMAD3, TERT
CELLULAR RESPONSE TO HEAT	55	1.91014	0.0313313	9	AKT1S1, BAG3, DNAJB1, HMOX1, HSPA1A, HSPA1B, HSPA8, HSPH1	CXCL10
REGULATION OF DNA TEMPLATED TRANSCRIPTION IN RESPONSE TO STRESS	45	1.90328	0.0316586	7	ATF4, BAG3, DDIT3, DNAJB1, EGR1, HMOX1, HSPA1A	N/A
CELLULAR RESPONSE TO CADMIUM ION	23	1.91087	0.0342373	2	AKR1C3, HMOX1	N/A
PROTEIN REFOLDING	16	1.91171	0.0376246	5	DNAJB2, HSPA1A, HSPA1B, HSPA8, PPID	N/A
NEGATIVE REGULATION OF MITOCHONDRION ORGANIZATION	17	1.8638	0.0432667	2	BAG3, HSPA1A	N/A
REGULATION OF RESPONSE TO ENDOPLASMIC RETICULUM STRESS	31	1.8574	0.0440406	4	DDIT3, DNAJB9, HSPA1A, PMAIP1	N/A
RESPONSE TO TEMPERATURE STIMULUS	88	1.86469	0.0459252	11	AKT1S1, BAG3, DNAJA1, DNAJB1, HMOX1, HSPA1A, HSPA1B, HSPA8, HSPH1	CXCL10, CXCL12
RESPONSE TO OXIDATIVE STRESS	181	1.86897	0.046912	20	AKR1C3, ATF4, CYCS, ETV5, FOSL1, GCLM, GSR, HMOX1, HSPA1A, HSPA1B, HSPB1, NQO1, SLC7A11, TLR6, TXNRD1	MDM2, PRKCD, TLR4, TNFAIP3, TXNIP
NES, normalized enrichment score; DEGs, differentially expressed genes; FDR, false discovery rate; N/A, not applicable.
